# Supplementary material for: Classification of High-Grade Serous Ovarian Carcinoma by Epithelial-to-Mesenchymal Transition Signature and Homologous Recombination Repair Genes
Source: Genes (Basel). 2021 Jul 20;12(7):1103. doi: 10.3390/genes12071103 (PMC8303300; doi:10.3390/genes12071103)

Fig. S1

*gBRCA1*mut\_1

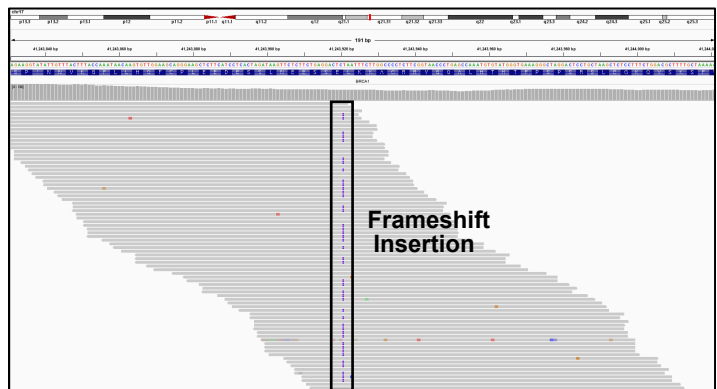

*gBRCA1*mut\_2

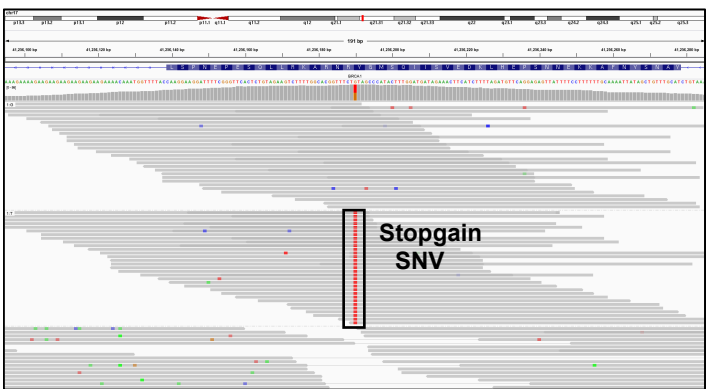

*gBRCA1*mut\_3

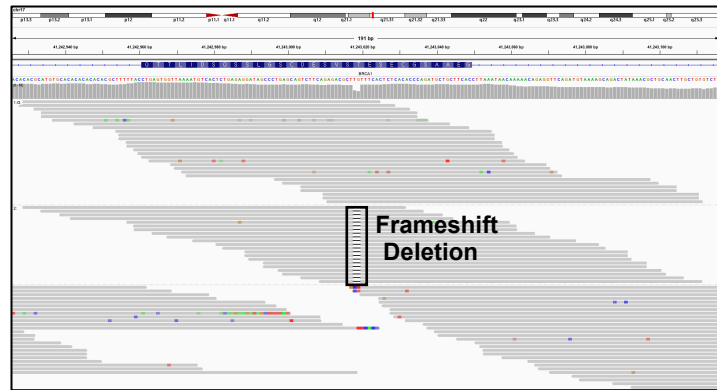

*gBRCA1*mut\_4

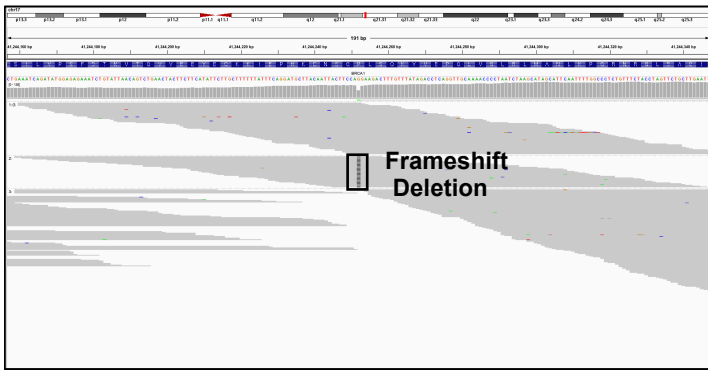

*gBRCA1*mut\_5

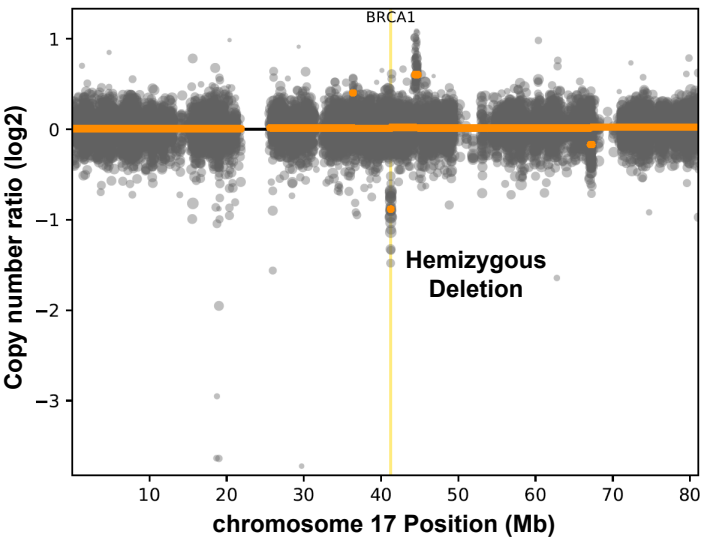

Fig. S1

*gBRCA2mut\_1*

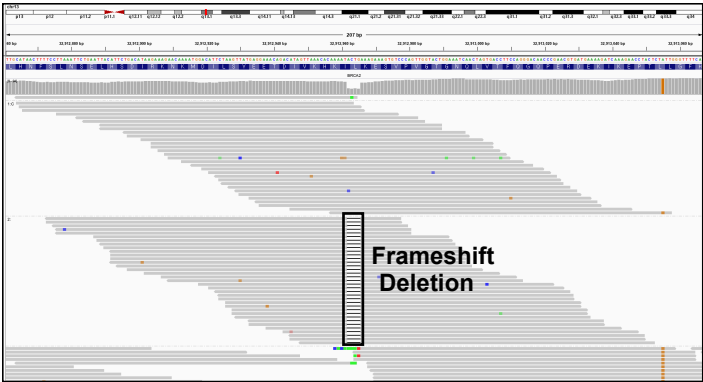

*gBRCA2mut\_2*

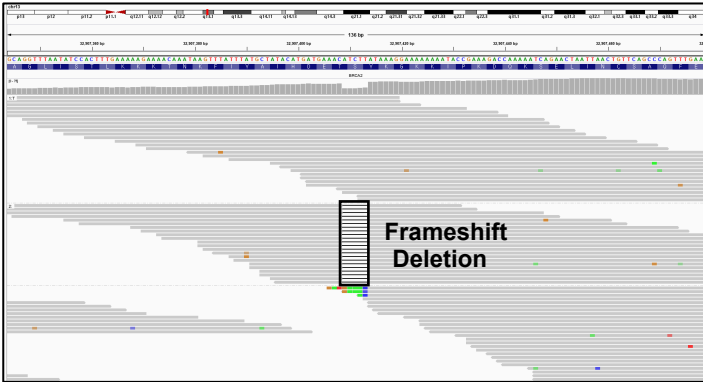

*gBRCA2mut\_3*

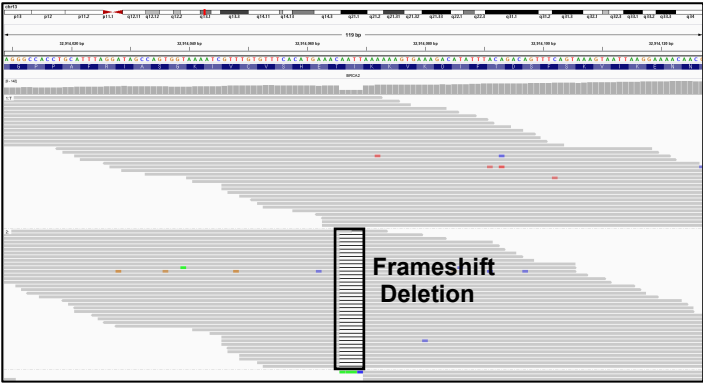

*gBRCA2mut\_4*

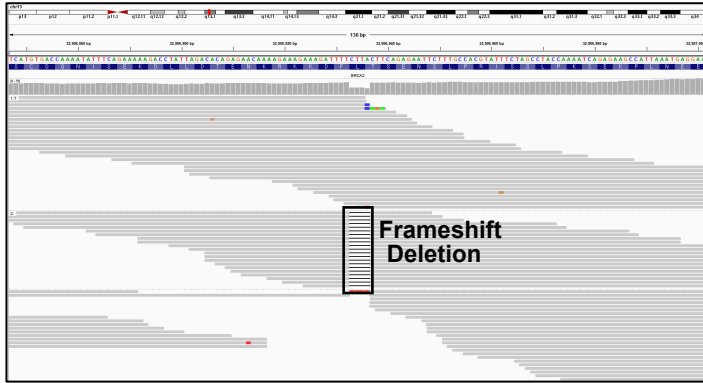

*gBRCA2mut\_5*

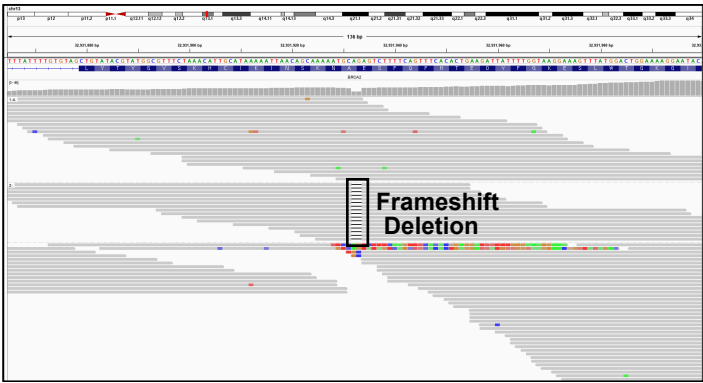

Supplement: Supplementary file 1 [file genes-12-01103-s001.zip › Figure S1.pdf]
