# Supplementary material for: Classification of High-Grade Serous Ovarian Carcinoma by Epithelial-to-Mesenchymal Transition Signature and Homologous Recombination Repair Genes
Source: Genes (Basel). 2021 Jul 20;12(7):1103. doi: 10.3390/genes12071103 (PMC8303300; doi:10.3390/genes12071103)
Supplement: Supplementary file 1 [file genes-12-01103-s001.zip › Table S1.pdf]

**Table S1.** A detailed summary of sequencing coverage and quality metrics of WES.

| Sample ID | Category   | Total number of sequenced reads | Total number of mapped non-duplicate reads | Properly Paired reads | Mate mapped to a different chromosome | Mate mapped to a different chromosome with mapping quality $\geq 5$ | Total number of covered bases | Coverage per base, median (IQR) | Percentage of targeted bases with coverage $\geq 10$ | Percentage of targeted bases with coverage $\geq 20$ | Percentage of targeted bases with coverage $\geq 30$ |
|-----------|------------|---------------------------------|--------------------------------------------|-----------------------|---------------------------------------|---------------------------------------------------------------------|-------------------------------|---------------------------------|------------------------------------------------------|------------------------------------------------------|------------------------------------------------------|
| N_BRCA1_1 | Normal WES | 132,561,499                     | 95,720,825                                 | 94,877,897            | 232,952                               | 218,856                                                             | 98,392,567                    | 71 (34–121)                     | 94.4                                                 | 86.1                                                 | 77.6                                                 |
| N_BRCA1_2 | Normal WES | 116,232,714                     | 81,140,930                                 | 80,282,572            | 400,754                               | 378,440                                                             | 98,334,347                    | 59 (28–102)                     | 92.3                                                 | 81.9                                                 | 72.3                                                 |
| N_BRCA1_3 | Normal WES | 112,369,126                     | 73,085,486                                 | 72,424,000            | 361,868                               | 340,220                                                             | 98,592,361                    | 53 (30–85)                      | 95.6                                                 | 86.2                                                 | 74.4                                                 |
| N_BRCA1_4 | Normal WES | 112,978,210                     | 80,529,713                                 | 79,891,545            | 297,929                               | 280,451                                                             | 98,419,245                    | 59 (30–99)                      | 94                                                   | 84.5                                                 | 74.6                                                 |
| N_BRCA1_5 | Normal WES | 117,348,438                     | 85,986,674                                 | 85,194,614            | 330,489                               | 311,324                                                             | 98,396,254                    | 62 (29–107)                     | 93.1                                                 | 83.3                                                 | 73.9                                                 |
| N_BRCA2_1 | Normal WES | 114,976,738                     | 79,916,077                                 | 79,220,687            | 408,754                               | 385,575                                                             | 98,485,396                    | 59 (31–97)                      | 94.8                                                 | 85.9                                                 | 75.6                                                 |
| N_BRCA2_2 | Normal WES | 105,035,318                     | 77,091,194                                 | 76,255,776            | 320,857                               | 302,978                                                             | 98,290,372                    | 56 (26–98)                      | 91.8                                                 | 80.8                                                 | 70.8                                                 |
| N_BRCA2_3 | Normal WES | 99,579,372                      | 72,865,494                                 | 72,186,388            | 322,659                               | 304,585                                                             | 98,392,451                    | 54 (27–91)                      | 92.9                                                 | 82.1                                                 | 71.4                                                 |
| N_BRCA2_4 | Normal WES | 103,268,159                     | 75,528,325                                 | 74,662,055            | 436,185                               | 412,290                                                             | 98,309,828                    | 55 (26–97)                      | 91.8                                                 | 80.7                                                 | 70.7                                                 |
| N_BRCA2_5 | Normal WES | 102,690,757                     | 72,426,343                                 | 71,904,429            | 179,664                               | 168,245                                                             | 98,313,616                    | 53 (26–92)                      | 92.2                                                 | 81                                                   | 70.5                                                 |
| N_WT_1    | Normal WES | 109,730,922                     | 78,977,243                                 | 78,217,563            | 384,152                               | 362,312                                                             | 98,390,936                    | 57 (28–99)                      | 92.9                                                 | 82.6                                                 | 72.6                                                 |
| N_WT_2    | Normal WES | 102,006,034                     | 72,768,774                                 | 72,166,118            | 345,855                               | 325,362                                                             | 98,478,000                    | 53 (28–89)                      | 94.5                                                 | 83.8                                                 | 72.5                                                 |
| N_WT_3    | Normal WES | 111,474,711                     | 79,702,748                                 | 79,062,015            | 261,611                               | 246,235                                                             | 98,403,892                    | 60 (30–100)                     | 94.2                                                 | 84.8                                                 | 74.9                                                 |
| N_WT_4    | Normal WES | 102,282,842                     | 70,904,467                                 | 70,160,093            | 278,221                               | 262,197                                                             | 98,316,572                    | 52 (25–90)                      | 91.5                                                 | 79.8                                                 | 69.2                                                 |
| N_WT_5    | Normal WES | 101,865,324                     | 74,586,718                                 | 73,945,627            | 237,280                               | 223,202                                                             | 98,371,588                    | 55 (27–95)                      | 92.4                                                 | 81.4                                                 | 71                                                   |
| N_WT_6    | Normal WES | 104,086,149                     | 75,146,531                                 | 74,523,164            | 204,264                               | 192,154                                                             | 98,336,341                    | 56 (27–96)                      | 92.5                                                 | 81.7                                                 | 71.6                                                 |
| N_WT_7    | Normal WES | 104,994,622                     | 77,145,337                                 | 76,484,121            | 201,499                               | 189,437                                                             | 98,290,628                    | 56 (26–96)                      | 91.8                                                 | 80.7                                                 | 70.7                                                 |
| N_WT_8    | Normal WES | 95,900,638                      | 68,999,557                                 | 68,157,536            | 383,149                               | 362,449                                                             | 98,224,123                    | 49 (22–86)                      | 89.7                                                 | 77.2                                                 | 66.6                                                 |
| N_WT_9    | Normal WES | 100,755,435                     | 71,809,823                                 | 71,156,885            | 241,262                               | 227,374                                                             | 98,291,743                    | 52 (25–89)                      | 91.8                                                 | 80.2                                                 | 69.6                                                 |
| N_WT_10   | Normal WES | 100,635,873                     | 71,699,846                                 | 71,004,355            | 235,204                               | 222,146                                                             | 98,266,601                    | 52 (24–90)                      | 90.9                                                 | 79.1                                                 | 68.6                                                 |
| T_BRCA1_1 | Tumor WES  | 153,482,549                     | 111,415,410                                | 110,001,095           | 508,800                               | 480,413                                                             | 98,366,775                    | 77 (36–138)                     | 94.2                                                 | 86.5                                                 | 78.7                                                 |
| T_BRCA1_2 | Tumor WES  | 145,899,568                     | 104,528,168                                | 103,491,717           | 345,480                               | 324,526                                                             | 98,405,326                    | 70 (33–126)                     | 93.8                                                 | 85.5                                                 | 77.1                                                 |
| T_BRCA1_3 | Tumor WES  | 135,408,443                     | 99,561,085                                 | 98,505,640            | 350,595                               | 330,401                                                             | 98,395,824                    | 69 (32–122)                     | 93.7                                                 | 85                                                   | 76.4                                                 |
| T_BRCA1_4 | Tumor WES  | 136,717,978                     | 101,467,903                                | 100,381,978           | 307,259                               | 288,788                                                             | 98,399,152                    | 68 (32–123)                     | 93.5                                                 | 84.9                                                 | 76.3                                                 |
| T_BRCA1_5 | Tumor WES  | 146,203,797                     | 104,664,776                                | 103,646,246           | 334,561                               | 314,758                                                             | 98,405,083                    | 71 (33–128)                     | 93.7                                                 | 85.5                                                 | 77.1                                                 |
| T_BRCA2_1 | Tumor WES  | 150,906,453                     | 102,105,761                                | 100,896,933           | 491,939                               | 464,858                                                             | 98,372,723                    | 70 (32–126)                     | 93.4                                                 | 84.8                                                 | 76.4                                                 |
| T_BRCA2_2 | Tumor WES  | 149,918,478                     | 109,969,198                                | 108,921,373           | 353,418                               | 333,402                                                             | 98,387,024                    | 76 (36–135)                     | 94.4                                                 | 86.7                                                 | 78.7                                                 |
| T_BRCA2_3 | Tumor WES  | 138,000,700                     | 103,621,959                                | 102,490,195           | 408,502                               | 385,843                                                             | 98,391,798                    | 74 (34–130)                     | 94.1                                                 | 86                                                   | 77.9                                                 |
| T_BRCA2_4 | Tumor WES  | 146,155,430                     | 106,231,786                                | 105,202,298           | 357,994                               | 337,327                                                             | 98,395,491                    | 75 (35–131)                     | 94.3                                                 | 86.6                                                 | 78.6                                                 |
| T_BRCA2_5 | Tumor WES  | 144,780,721                     | 103,143,893                                | 102,020,162           | 413,441                               | 389,099                                                             | 98,382,112                    | 69 (33–125)                     | 93.8                                                 | 85.5                                                 | 76.9                                                 |
| T_WT_1    | Tumor WES  | 140,166,492                     | 102,205,335                                | 101,141,107           | 333,806                               | 314,492                                                             | 98,422,545                    | 72 (34–126)                     | 94.2                                                 | 86.2                                                 | 77.9                                                 |

|         |           |             |             |             |         |         |            |             |      |      |      |
|---------|-----------|-------------|-------------|-------------|---------|---------|------------|-------------|------|------|------|
| T_WT_2  | Tumor WES | 143,237,732 | 104,389,002 | 103,447,240 | 309,711 | 291,196 | 98,322,446 | 70 (32–127) | 93.2 | 84.6 | 76.3 |
| T_WT_3  | Tumor WES | 142,754,271 | 100,362,774 | 99,266,080  | 383,073 | 360,988 | 98,333,642 | 70 (32–125) | 93.6 | 85   | 76.5 |
| T_WT_4  | Tumor WES | 149,009,652 | 102,660,646 | 101,782,136 | 251,625 | 235,866 | 98,348,541 | 72 (33–127) | 93.8 | 85.1 | 76.9 |
| T_WT_5  | Tumor WES | 146,657,432 | 106,445,024 | 105,276,908 | 427,012 | 401,926 | 98,387,584 | 72 (34–130) | 93.8 | 85.6 | 77.5 |
| T_WT_6  | Tumor WES | 147,477,186 | 107,688,197 | 106,637,986 | 349,053 | 329,270 | 98,388,516 | 78 (36–136) | 94.6 | 87.1 | 79.2 |
| T_WT_7  | Tumor WES | 150,076,192 | 108,436,494 | 107,324,481 | 330,318 | 310,294 | 98,426,389 | 78 (37–135) | 94.9 | 87.6 | 79.8 |
| T_WT_8  | Tumor WES | 139,283,195 | 101,507,796 | 100,354,292 | 414,630 | 390,862 | 98,409,057 | 71 (33–126) | 93.9 | 85.6 | 77.3 |
| T_WT_9  | Tumor WES | 144,984,211 | 101,593,268 | 100,653,016 | 325,161 | 306,343 | 98,358,925 | 70 (32–126) | 93.6 | 85   | 76.5 |
| T_WT_10 | Tumor WES | 152,112,193 | 110,081,078 | 109,088,724 | 242,472 | 227,047 | 98,388,241 | 72 (33–133) | 93.5 | 85.1 | 76.9 |

Abbreviation: IQR, interquartile range; WES, whole exome sequencing.

Whole Exome Sequencing reads (captured by SureSelect Human All Exon V6 kit) aligned onto GRCh37 reference genome using BWA aligner.
