# Supplementary material for: Classification of High-Grade Serous Ovarian Carcinoma by Epithelial-to-Mesenchymal Transition Signature and Homologous Recombination Repair Genes
Source: Genes (Basel). 2021 Jul 20;12(7):1103. doi: 10.3390/genes12071103 (PMC8303300; doi:10.3390/genes12071103)
Supplement: Supplementary file 1 [file genes-12-01103-s001.zip › Table S2.pdf]

**Table S2.** A detailed summary of sequencing coverage and quality metrics of RNA-seq.

| Sample ID | Category  | Total number of sequenced reads | Total number of pseudoaligned reads* | Total number of uniquely pseudoaligned reads | Percentage of pseudoaligned reads | Percentage of uniquely pseudoaligned reads | rRNA rate |
|-----------|-----------|---------------------------------|--------------------------------------|----------------------------------------------|-----------------------------------|--------------------------------------------|-----------|
| T_BRCA1_1 | Tumor RNA | 55,078,344                      | 51,890,442                           | 19,515,066                                   | 94.2                              | 35.4                                       | 8.84      |
| T_BRCA1_2 | Tumor RNA | 57,434,868                      | 55,494,782                           | 20,026,139                                   | 96.6                              | 34.9                                       | 2.24      |
| T_BRCA1_3 | Tumor RNA | 54,152,977                      | 51,418,251                           | 18,425,455                                   | 94.9                              | 34                                         | 4.27      |
| T_BRCA1_4 | Tumor RNA | 52,514,023                      | 49,118,309                           | 17,913,500                                   | 93.5                              | 34.1                                       | 8.39      |
| T_BRCA1_5 | Tumor RNA | 58,060,461                      | 55,652,375                           | 20,104,418                                   | 95.9                              | 34.6                                       | 4.66      |
| T_BRCA2_1 | Tumor RNA | 51,043,293                      | 48,135,468                           | 15,890,054                                   | 94.3                              | 31.1                                       | 14.80     |
| T_BRCA2_2 | Tumor RNA | 59,476,054                      | 55,642,619                           | 19,924,445                                   | 93.6                              | 33.5                                       | 15.14     |
| T_BRCA2_3 | Tumor RNA | 57,676,005                      | 54,661,802                           | 18,441,833                                   | 94.8                              | 32                                         | 10.30     |
| T_BRCA2_4 | Tumor RNA | 57,221,098                      | 54,660,071                           | 20,239,754                                   | 95.5                              | 35.4                                       | 8.06      |
| T_BRCA2_5 | Tumor RNA | 59,061,460                      | 56,680,666                           | 20,376,798                                   | 96                                | 34.5                                       | 5.59      |
| T_WT_1    | Tumor RNA | 58,764,960                      | 56,240,783                           | 21,923,911                                   | 95.7                              | 37.3                                       | 6.77      |
| T_WT_2    | Tumor RNA | 58,938,404                      | 57,253,142                           | 21,881,071                                   | 97.1                              | 37.1                                       | 2.53      |
| T_WT_3    | Tumor RNA | 56,121,852                      | 53,846,348                           | 18,892,959                                   | 95.9                              | 33.7                                       | 3.89      |
| T_WT_4    | Tumor RNA | 58,300,346                      | 53,742,473                           | 24,310,535                                   | 92.2                              | 41.7                                       | 11.62     |
| T_WT_5    | Tumor RNA | 60,704,131                      | 57,223,716                           | 19,859,280                                   | 94.3                              | 32.7                                       | 10.83     |
| T_WT_6    | Tumor RNA | 55,430,685                      | 52,525,610                           | 18,441,119                                   | 94.8                              | 33.3                                       | 9.45      |
| T_WT_7    | Tumor RNA | 61,660,304                      | 58,500,190                           | 21,383,314                                   | 94.9                              | 34.7                                       | 9.52      |
| T_WT_8    | Tumor RNA | 58,243,025                      | 55,325,870                           | 21,029,168                                   | 95                                | 36.1                                       | 9.20      |
| T_WT_9    | Tumor RNA | 60,054,479                      | 57,534,380                           | 22,098,744                                   | 95.8                              | 36.8                                       | 3.24      |
| T_WT_10   | Tumor RNA | 55,988,981                      | 53,477,201                           | 21,509,238                                   | 95.5                              | 38.4                                       | 1.83      |

Abbreviation: RNA-seq, RNA sequencing.

\*Pseudoaligned using kallisto onto RefSeq annotation release 105 for GRCh37.
