# Supplementary material for: Classification of High-Grade Serous Ovarian Carcinoma by Epithelial-to-Mesenchymal Transition Signature and Homologous Recombination Repair Genes
Source: Genes (Basel). 2021 Jul 20;12(7):1103. doi: 10.3390/genes12071103 (PMC8303300; doi:10.3390/genes12071103)
Supplement: Supplementary file 1 [file genes-12-01103-s001.zip › Table S3.xlsx]

## Sheet: Sheet1
Table S3. List of pathogenic germline variants in BRCA1 and BRCA2 from blood samples of gBRCA1mut and gBRCA2mut groups
Sample	Chromosome	Start	End	Ref	Alt	Func.refGene	Gene.refGene	ExonicFunc.refGene	AAChange.refGene	Func.knownGene	Gene.knownGene	ExonicFunc.knownGene	AAChange.knownGene	Func.ensGene	Gene.ensGene	ExonicFunc.ensGene	AAChange.ensGene	CLNSIG	CLNALLELEID	CLNDN	CLNDISDB	CLNREVSTAT
gBRCA1mut_1	17	41243018	41243019	TG	-	exonic	BRCA1	frameshift deletion	BRCA1:NM_007297:exon10:c.3986_3987del:p.T1329fs,BRCA1:NM_007298:exon10:c.818_819del:p.T273fs,BRCA1:NM_007294:exon11:c.4127_4128del:p.T1376fs,BRCA1:NM_007299:exon11:c.818_819del:p.T273fs,BRCA1:NM_007300:exon11:c.4127_4128del:p.T1376fs	exonic	BRCA1	frameshift deletion	BRCA1:uc010whq.1:exon5:c.314_315del:p.T105fs,BRCA1:uc010cyx.3:exon10:c.3986_3987del:p.T1329fs,BRCA1:uc010whl.2:exon10:c.818_819del:p.T273fs,BRCA1:uc010whp.2:exon10:c.677_678del:p.T226fs,BRCA1:uc010whr.1:exon10:c.677_678del:p.T226fs,BRCA1:uc002icp.4:exon11:c.3914_3915del:p.T1305fs,BRCA1:uc002icq.3:exon11:c.4127_4128del:p.T1376fs,BRCA1:uc002ict.3:exon11:c.4127_4128del:p.T1376fs,BRCA1:uc002icu.3:exo…	exonic	ENSG00000012048	frameshift deletion	ENSG00000012048:ENST00000484087:exon5:c.440_441del:p.T147fs,ENSG00000012048:ENST00000487825:exon5:c.443_444del:p.T148fs,ENSG00000012048:ENST00000351666:exon7:c.578_579del:p.T193fs,ENSG00000012048:ENST00000309486:exon10:c.3239_3240del:p.T1080fs,ENSG00000012048:ENST00000352993:exon10:c.701_702del:p.T234fs,ENSG00000012048:ENST00000493795:exon10:c.3986_3987del:p.T1329fs,ENSG00000012048:ENST0000049391…
gBRCA1mut_2	17	41243920	41243920	-	T	exonic	BRCA1	frameshift insertion	BRCA1:NM_007297:exon9:c.3486dupA:p.E1163fs,BRCA1:NM_007294:exon10:c.3627dupA:p.E1210fs,BRCA1:NM_007300:exon10:c.3627dupA:p.E1210fs	exonic	BRCA1	frameshift insertion	BRCA1:uc010wht.1:exon2:c.2739dupA:p.E914fs,BRCA1:uc002ide.1:exon4:c.3120dupA:p.E1041fs,BRCA1:uc002idd.3:exon9:c.3627dupA:p.E1210fs,BRCA1:uc010cyx.3:exon9:c.3486dupA:p.E1163fs,BRCA1:uc010cza.2:exon9:c.3549dupA:p.E1184fs,BRCA1:uc002icp.4:exon10:c.3414dupA:p.E1139fs,BRCA1:uc002icq.3:exon10:c.3627dupA:p.E1210fs,BRCA1:uc002ict.3:exon10:c.3627dupA:p.E1210fs,BRCA1:uc010cyy.1:exon10:c.3627dupA:p.E1210fs,…	exonic	ENSG00000012048	frameshift insertion	ENSG00000012048:ENST00000309486:exon9:c.2739dupA:p.E914fs,ENSG00000012048:ENST00000493795:exon9:c.3486dupA:p.E1163fs,ENSG00000012048:ENST00000346315:exon10:c.3627dupA:p.E1210fs,ENSG00000012048:ENST00000354071:exon10:c.3627dupA:p.E1210fs,ENSG00000012048:ENST00000357654:exon10:c.3627dupA:p.E1210fs,ENSG00000012048:ENST00000471181:exon10:c.3627dupA:p.E1210fs	Pathogenic	46090	Hereditary_breast_and_ovarian_cancer_syndrome|Familial_cancer_of_breast|Hereditary_cancer-predisposing_syndrome|Ovarian_Serous_Surface_Papillary_Adenocarcinoma|Breast-ovarian_cancer,_familial_1|not_provided	MeSH:D061325,MedGen:C0677776,Orphanet:ORPHA145|MedGen:C0006142,OMIM:114480,Orphanet:ORPHA227535,SNOMED_CT:254843006|MedGen:C0027672,SNOMED_CT:699346009|MedGen:C1335178|MedGen:C2676676,OMIM:604370|MedGen:CN517202	reviewed_by_expert_panel
gBRCA1mut_3	17	41244252	41244252	G	-	exonic	BRCA1	frameshift deletion	BRCA1:NM_007297:exon9:c.3155delC:p.P1052fs,BRCA1:NM_007294:exon10:c.3296delC:p.P1099fs,BRCA1:NM_007300:exon10:c.3296delC:p.P1099fs	exonic	BRCA1	frameshift deletion	BRCA1:uc010wht.1:exon2:c.2408delC:p.P803fs,BRCA1:uc002ide.1:exon4:c.2789delC:p.P930fs,BRCA1:uc002idd.3:exon9:c.3296delC:p.P1099fs,BRCA1:uc010cyx.3:exon9:c.3155delC:p.P1052fs,BRCA1:uc010cza.2:exon9:c.3218delC:p.P1073fs,BRCA1:uc002icp.4:exon10:c.3083delC:p.P1028fs,BRCA1:uc002icq.3:exon10:c.3296delC:p.P1099fs,BRCA1:uc002ict.3:exon10:c.3296delC:p.P1099fs,BRCA1:uc010cyy.1:exon10:c.3296delC:p.P1099fs,B…	exonic	ENSG00000012048	frameshift deletion	ENSG00000012048:ENST00000309486:exon9:c.2408delC:p.P803fs,ENSG00000012048:ENST00000493795:exon9:c.3155delC:p.P1052fs,ENSG00000012048:ENST00000346315:exon10:c.3296delC:p.P1099fs,ENSG00000012048:ENST00000354071:exon10:c.3296delC:p.P1099fs,ENSG00000012048:ENST00000357654:exon10:c.3296delC:p.P1099fs,ENSG00000012048:ENST00000471181:exon10:c.3296delC:p.P1099fs	Pathogenic	69491	Hereditary_breast_and_ovarian_cancer_syndrome|Hereditary_cancer-predisposing_syndrome|Breast-ovarian_cancer,_familial_1	MeSH:D061325,MedGen:C0677776,Orphanet:ORPHA145|MedGen:C0027672,SNOMED_CT:699346009|MedGen:C2676676,OMIM:604370	reviewed_by_expert_panel
gBRCA1mut_4	17	41256190	41256190	G	T	exonic	BRCA1	stopgain	BRCA1:NM_007297:exon5:c.C249A:p.Y83X,BRCA1:NM_007298:exon5:c.C390A:p.Y130X,BRCA1:NM_007294:exon6:c.C390A:p.Y130X,BRCA1:NM_007299:exon6:c.C390A:p.Y130X,BRCA1:NM_007300:exon6:c.C390A:p.Y130X	exonic	BRCA1	stopgain	BRCA1:uc002ide.1:exon2:c.C9A:p.Y3X,BRCA1:uc010whq.1:exon2:c.C9A:p.Y3X,BRCA1:uc002idd.3:exon5:c.C390A:p.Y130X,BRCA1:uc010cyx.3:exon5:c.C249A:p.Y83X,BRCA1:uc010cza.2:exon5:c.C312A:p.Y104X,BRCA1:uc010whl.2:exon5:c.C390A:p.Y130X,BRCA1:uc010whp.2:exon5:c.C249A:p.Y83X,BRCA1:uc010whr.1:exon5:c.C249A:p.Y83X,BRCA1:uc002icp.4:exon6:c.C180A:p.Y60X,BRCA1:uc002icq.3:exon6:c.C390A:p.Y130X,BRCA1:uc002ict.3:exon…	exonic	ENSG00000012048	stopgain	ENSG00000012048:ENST00000484087:exon2:c.C138A:p.Y46X,ENSG00000012048:ENST00000487825:exon2:c.C138A:p.Y46X,ENSG00000012048:ENST00000351666:exon5:c.C390A:p.Y130X,ENSG00000012048:ENST00000477152:exon5:c.C312A:p.Y104X,ENSG00000012048:ENST00000493795:exon5:c.C249A:p.Y83X,ENSG00000012048:ENST00000493919:exon5:c.C249A:p.Y83X,ENSG00000012048:ENST00000346315:exon6:c.C390A:p.Y130X,ENSG00000012048:ENST00000…	Pathogenic	69713	Hereditary_breast_and_ovarian_cancer_syndrome|Hereditary_cancer-predisposing_syndrome|Breast-ovarian_cancer,_familial_1	MeSH:D061325,MedGen:C0677776,Orphanet:ORPHA145|MedGen:C0027672,SNOMED_CT:699346009|MedGen:C2676676,OMIM:604370	reviewed_by_expert_panel
gBRCA1mut_5*	17	41228473	41277254
gBRCA2mut_1	13	32906933	32906936	CTTA	-	exonic	BRCA2	frameshift deletion	BRCA2:NM_000059:exon10:c.1318_1321del:p.L440fs	exonic	BRCA2	frameshift deletion	BRCA2:uc001uua.1:exon10:c.949_952del:p.L317fs,BRCA2:uc001uub.1:exon10:c.1318_1321del:p.L440fs	exonic	ENSG00000139618	frameshift deletion	ENSG00000139618:ENST00000380152:exon10:c.1318_1321del:p.L440fs,ENSG00000139618:ENST00000530893:exon10:c.949_952del:p.L317fs,ENSG00000139618:ENST00000544455:exon10:c.1318_1321del:p.L440fs	Pathogenic	408849	Breast-ovarian_cancer,_familial_2|not_provided	MedGen:C2675520,OMIM:612555|MedGen:CN517202	reviewed_by_expert_panel
gBRCA2mut_2	13	32907409	32907413	ATCTT	-	exonic	BRCA2	frameshift deletion	BRCA2:NM_000059:exon10:c.1794_1798del:p.T598fs	exonic	BRCA2	frameshift deletion	BRCA2:uc001uua.1:exon10:c.1425_1429del:p.T475fs,BRCA2:uc001uub.1:exon10:c.1794_1798del:p.T598fs	exonic	ENSG00000139618	frameshift deletion	ENSG00000139618:ENST00000380152:exon10:c.1794_1798del:p.T598fs,ENSG00000139618:ENST00000530893:exon10:c.1425_1429del:p.T475fs,ENSG00000139618:ENST00000544455:exon10:c.1794_1798del:p.T598fs	Pathogenic	46312	Hereditary_breast_and_ovarian_cancer_syndrome|Hereditary_cancer-predisposing_syndrome|Breast-ovarian_cancer,_familial_2|not_provided	MeSH:D061325,MedGen:C0677776,Orphanet:ORPHA145|MedGen:C0027672,SNOMED_CT:699346009|MedGen:C2675520,OMIM:612555|MedGen:CN517202	reviewed_by_expert_panel
gBRCA2mut_3	13	32912962	32912965	ACTG	-	exonic	BRCA2	frameshift deletion	BRCA2:NM_000059:exon11:c.4470_4473del:p.I1490fs	exonic	BRCA2	frameshift deletion	BRCA2:uc001uub.1:exon11:c.4470_4473del:p.I1490fs	exonic	ENSG00000139618	frameshift deletion	ENSG00000139618:ENST00000380152:exon11:c.4470_4473del:p.I1490fs,ENSG00000139618:ENST00000544455:exon11:c.4470_4473del:p.I1490fs	Pathogenic	66320	Hereditary_breast_and_ovarian_cancer_syndrome|Hereditary_cancer-predisposing_syndrome|Breast-ovarian_cancer,_familial_2|not_provided	MeSH:D061325,MedGen:C0677776,Orphanet:ORPHA145|MedGen:C0027672,SNOMED_CT:699346009|MedGen:C2675520,OMIM:612555|MedGen:CN517202	reviewed_by_expert_panel
gBRCA2mut_4	13	32914066	32914069	AATT	-	exonic	BRCA2	frameshift deletion	BRCA2:NM_000059:exon11:c.5574_5577del:p.T1858fs	exonic	BRCA2	frameshift deletion	BRCA2:uc001uub.1:exon11:c.5574_5577del:p.T1858fs	exonic	ENSG00000139618	frameshift deletion	ENSG00000139618:ENST00000380152:exon11:c.5574_5577del:p.T1858fs,ENSG00000139618:ENST00000544455:exon11:c.5574_5577del:p.T1858fs	Pathogenic	46531	Hereditary_breast_and_ovarian_cancer_syndrome|Hereditary_cancer-predisposing_syndrome|Fanconi_anemia,_complementation_group_D1|Breast-ovarian_cancer,_familial_2|Breast_and/or_ovarian_cancer|not_provided	MeSH:D061325,MedGen:C0677776,Orphanet:ORPHA145|MedGen:C0027672,SNOMED_CT:699346009|MedGen:C1838457,OMIM:605724,Orphanet:ORPHA319462|MedGen:C2675520,OMIM:612555|MedGen:CN221562|MedGen:CN517202	reviewed_by_expert_panel
gBRCA2mut_5	13	32931932	32931933	AG	-	exonic	BRCA2	frameshift deletion	BRCA2:NM_000059:exon16:c.7671_7672del:p.A2557fs	exonic	BRCA2	frameshift deletion	BRCA2:uc001uub.1:exon16:c.7671_7672del:p.A2557fs	exonic	ENSG00000139618	frameshift deletion	ENSG00000139618:ENST00000380152:exon16:c.7671_7672del:p.A2557fs,ENSG00000139618:ENST00000544455:exon16:c.7671_7672del:p.A2557fs
*Large deletion in BRCA1 Exon 1-14
