# Supplementary material for: Classification of High-Grade Serous Ovarian Carcinoma by Epithelial-to-Mesenchymal Transition Signature and Homologous Recombination Repair Genes
Source: Genes (Basel). 2021 Jul 20;12(7):1103. doi: 10.3390/genes12071103 (PMC8303300; doi:10.3390/genes12071103)
Supplement: Supplementary file 1 [file genes-12-01103-s001.zip › Table S4.pdf]

**Table S4.** List of genes positively correlated and negatively correlated with PC1.

| <b>Genes positively correlated with PC1<br/>(Pearson <math>r &gt; 0.9</math>)</b> | <b>Genes negatively correlated with PC1<br/>(Pearson <math>r &lt; -0.9</math>)</b> |
|-----------------------------------------------------------------------------------|------------------------------------------------------------------------------------|
| FABP4 (0.973)                                                                     | BAIAP2L1 (-0.969)                                                                  |
| CCDC36 (0.971)                                                                    | KDF1 (-0.967)                                                                      |
| GNG11 (0.971)                                                                     | TPD52 (-0.951)                                                                     |
| CPED1 (0.969)                                                                     | GRHL2 (-0.949)                                                                     |
| ECM2 (0.965)                                                                      | C19orf33 (-0.945)                                                                  |
| LRRC17 (0.965)                                                                    | HOOK1 (-0.942)                                                                     |
| CD302 (0.963)                                                                     | FOLR1 (-0.942)                                                                     |
| ZNF781 (0.963)                                                                    | MARVELD2 (-0.942)                                                                  |
| FHL5 (0.962)                                                                      | ESRP1 (-0.941)                                                                     |
| PLA2G5 (0.961)                                                                    | EPPK1 (-0.939)                                                                     |
| LIX1L (0.960)                                                                     | PTGS1 (-0.938)                                                                     |
| ITM2A (0.960)                                                                     | MAL2 (-0.938)                                                                      |
| JAM2 (0.958)                                                                      | ARHGAP8 (-0.937)                                                                   |
| GRK5 (0.957)                                                                      | PARD6B (-0.936)                                                                    |
| DGKB (0.955)                                                                      | SMPDL3B (-0.929)                                                                   |
| COX7A1 (0.953)                                                                    | EPCAM (-0.928)                                                                     |
| ENPP6 (0.953)                                                                     | SPINT1 (-0.928)                                                                    |
| RERGL (0.952)                                                                     | TMPRSS3 (-0.928)                                                                   |
| STXBP5L (0.952)                                                                   | MYEF2 (-0.928)                                                                     |
| TMEM150C (0.951)                                                                  | CHD7 (-0.927)                                                                      |
| SOCS2 (0.951)                                                                     | MUC1 (-0.926)                                                                      |
| ITPR1 (0.950)                                                                     | AP1M2 (-0.926)                                                                     |
| DIRAS3 (0.950)                                                                    | IGSF9 (-0.924)                                                                     |
| TTYH2 (0.949)                                                                     | CLDN7 (-0.923)                                                                     |
| LRRN4CL (0.948)                                                                   | RCC1 (-0.922)                                                                      |
| WFIKK2 (0.948)                                                                    | FAM83H (-0.920)                                                                    |
| NUDT11 (0.947)                                                                    | SCNN1A (-0.918)                                                                    |
| CCL14 (0.947)                                                                     | MYH14 (-0.918)                                                                     |
| CNRIP1 (0.947)                                                                    | CBLC (-0.917)                                                                      |
| OGN (0.947)                                                                       | MSLN (-0.916)                                                                      |
| PRPH2 (0.946)                                                                     | OVOL2 (-0.916)                                                                     |
| FGF2 (0.946)                                                                      | MUC16 (-0.916)                                                                     |
| AMELX (0.946)                                                                     | C6orf132 (-0.915)                                                                  |
| RAB9B (0.945)                                                                     | PAX8 (-0.915)                                                                      |
| PRSS35 (0.945)                                                                    | ZNF165 (-0.914)                                                                    |
| CSDC2 (0.945)                                                                     | EPS8L1 (-0.913)                                                                    |
| XPNPEP2 (0.945)                                                                   | ILDR1 (-0.913)                                                                     |
| PLP1 (0.944)                                                                      | KLHL14 (-0.913)                                                                    |
| SYNE1 (0.944)                                                                     | EHF (-0.912)                                                                       |
| PDE1C (0.943)                                                                     | WWC1 (-0.910)                                                                      |
| NEGR1 (0.943)                                                                     | CAMSAP3 (-0.909)                                                                   |
| ANKRD34A (0.941)                                                                  | SPINT2 (-0.908)                                                                    |
| TRPC6 (0.941)                                                                     | ESRP2 (-0.908)                                                                     |
| ANGPTL1 (0.941)                                                                   | DDR1 (-0.907)                                                                      |
| CTNNA3 (0.940)                                                                    | CELSR1 (-0.907)                                                                    |
| GPRASP1 (0.940)                                                                   | ABHD11 (-0.907)                                                                    |
| LGI4 (0.939)                                                                      | CELSR2 (-0.907)                                                                    |
| HAND2 (0.939)                                                                     | SERINC2 (-0.906)                                                                   |

|                  |                  |
|------------------|------------------|
| NID1 (0.939)     | CLDN3 (-0.905)   |
| NDNF (0.938)     | KLK8 (-0.904)    |
| NR4A3 (0.938)    | RHPN1 (-0.904)   |
| PDZRN4 (0.938)   | CRB3 (-0.904)    |
| RNASE4 (0.937)   | VAMP8 (-0.903)   |
| GPRASP2 (0.937)  | GRB7 (-0.903)    |
| LRRTM3 (0.937)   | RASAL1 (-0.903)  |
| MMRN1 (0.937)    | PKP3 (-0.902)    |
| SNCA (0.937)     | LSR (-0.902)     |
| PROK1 (0.937)    | SLC29A2 (-0.902) |
| TCEAL7 (0.936)   | BCAM (-0.902)    |
| PPARG (0.936)    | S100A14 (-0.900) |
| ADH1B (0.936)    |                  |
| C11orf96 (0.936) |                  |
| BTG2 (0.933)     |                  |
| PRDM8 (0.933)    |                  |
| SLC7A14 (0.933)  |                  |
| LEFTY2 (0.932)   |                  |
| STAB2 (0.931)    |                  |
| DPT (0.931)      |                  |
| NAV3 (0.931)     |                  |
| PAPSS2 (0.931)   |                  |
| RARA (0.930)     |                  |
| TSPAN5 (0.929)   |                  |
| SLC18A2 (0.929)  |                  |
| ABCA8 (0.928)    |                  |
| TWIST2 (0.928)   |                  |
| NDN (0.927)      |                  |
| SPARCL1 (0.927)  |                  |
| ARHGAP6 (0.927)  |                  |
| PSD3 (0.926)     |                  |
| VIT (0.926)      |                  |
| GSTM5 (0.926)    |                  |
| SPRR2F (0.926)   |                  |
| PLD5 (0.926)     |                  |
| ADRB3 (0.926)    |                  |
| KLF2 (0.925)     |                  |
| MFAP4 (0.925)    |                  |
| CELF2 (0.925)    |                  |
| STAT5B (0.924)   |                  |
| ZNF331 (0.924)   |                  |
| PDE1B (0.923)    |                  |
| RHOBTB3 (0.923)  |                  |
| MALRD1 (0.923)   |                  |
| PTGFR (0.923)    |                  |
| NR2F1 (0.922)    |                  |
| GNA14 (0.922)    |                  |
| MYH11 (0.922)    |                  |
| FSHR (0.921)     |                  |
| PABPC5 (0.921)   |                  |
| GEM (0.920)      |                  |

CPZ (0.920)  
MAB21L1 (0.919)  
CCN5 (0.919)  
KLF9 (0.919)  
VAT1 (0.918)  
NXPH3 (0.918)  
SCUBE1 (0.918)  
CLEC3B (0.917)  
TENT5A (0.917)  
HRC (0.916)  
KLF4 (0.916)  
KIAA1755 (0.916)  
SYTL4 (0.916)  
ITGA8 (0.916)  
FOXO1 (0.916)  
PEAR1 (0.915)  
ANTXR2 (0.915)  
CALCRL (0.915)  
RAB3C (0.914)  
HIC1 (0.914)  
CPEB1 (0.913)  
CIRBP (0.913)  
ZCCHC18 (0.913)  
ANKRD29 (0.913)  
VIM (0.912)  
PROS1 (0.911)  
TPSG1 (0.911)  
ACSM2B (0.910)  
CRHBP (0.910)  
RHOB (0.909)  
LIN7A (0.909)  
CCBE1 (0.909)  
GLP2R (0.909)  
CD300LG (0.909)  
NR1H4 (0.908)  
TRPC4 (0.908)  
TFPI (0.908)  
HAS1 (0.908)  
SGCZ (0.908)  
ZEB2 (0.907)  
STAMBPL1 (0.907)  
DLC1 (0.907)  
CSRNP1 (0.907)  
MCC (0.907)  
PER1 (0.907)  
STARD9 (0.907)  
PCED1B (0.906)  
FXD2 (0.906)  
C21orf62 (0.906)  
ZBTB20 (0.906)  
C3orf70 (0.905)

ANG (0.905)  
C8orf49 (0.905)  
PCDH18 (0.905)  
ARHGAP10 (0.905)  
FEZ1 (0.905)  
LHFPL6 (0.905)  
KLHL4 (0.904)  
PODN (0.904)  
BMPER (0.904)  
MORF4L2 (0.904)  
GLI2 (0.904)  
ARHGEF6 (0.904)  
ARMCX4 (0.904)  
TNFSF12 (0.903)  
CDON (0.903)  
ANGPT4 (0.903)  
IGFBP4 (0.903)  
PLD1 (0.903)  
PRDM6 (0.903)  
PLPP3 (0.903)  
FGF7 (0.902)  
CLDN11 (0.902)  
SLC1A7 (0.902)  
GNA12 (0.902)  
PLBD2 (0.901)  
STARD13 (0.901)  
NAP1L3 (0.900)  
MRGPRF (0.900)  
SOBP (0.900)  
GFRA1 (0.900)

---

Abbreviation: PC, principal component.
