# Supplementary material for: Classification of High-Grade Serous Ovarian Carcinoma by Epithelial-to-Mesenchymal Transition Signature and Homologous Recombination Repair Genes
Source: Genes (Basel). 2021 Jul 20;12(7):1103. doi: 10.3390/genes12071103 (PMC8303300; doi:10.3390/genes12071103)
Supplement: Supplementary file 1 [file genes-12-01103-s001.zip › Table S5.pdf]

**Table S5.** TFEA results from genes negatively correlated with PC1 (Pearson  $r < -0.9$ ).

| Transcription Factor | Overlapping Genes | FDR $Q$ value |
|----------------------|-------------------|---------------|
| <i>GRHL2</i>         | 28                | 4.02E-27      |
| <i>SPDEF</i>         | 27                | 4.85E-26      |
| <i>FOXA1</i>         | 26                | 7.58E-25      |
| <i>OVOL1</i>         | 24                | 1.91E-22      |
| <i>ELF3</i>          | 24                | 1.91E-22      |
| <i>IRF6</i>          | 24                | 1.91E-22      |
| <i>EHF</i>           | 23                | 3.50E-21      |
| <i>KLF5</i>          | 22                | 5.07E-20      |
| <i>GATA3</i>         | 22                | 5.07E-20      |
| <i>TFCP2L1</i>       | 22                | 5.07E-20      |
