# Supplementary material for: Classification of High-Grade Serous Ovarian Carcinoma by Epithelial-to-Mesenchymal Transition Signature and Homologous Recombination Repair Genes
Source: Genes (Basel). 2021 Jul 20;12(7):1103. doi: 10.3390/genes12071103 (PMC8303300; doi:10.3390/genes12071103)
Supplement: Supplementary file 1 [file genes-12-01103-s001.zip › Table S6.pdf]

**Table S6.** List of 30 homologous recombination repair genes used in this study.

| Homologous recombination repair genes |
|---------------------------------------|
| <i>BRCA1</i>                          |
| <i>BRCA2</i>                          |
| <i>ATM</i>                            |
| <i>ATR</i>                            |
| <i>ATRX</i>                           |
| <i>BARD1</i>                          |
| <i>BLM</i>                            |
| <i>BRIP1</i>                          |
| <i>CHEK1</i>                          |
| <i>CHEK2</i>                          |
| <i>FANCA</i>                          |
| <i>FANCC</i>                          |
| <i>FANCD2</i>                         |
| <i>FANCE</i>                          |
| <i>FANCF</i>                          |
| <i>FANCG</i>                          |
| <i>FANCI</i>                          |
| <i>FANCL</i>                          |
| <i>FANCM</i>                          |
| <i>MRE11</i>                          |
| <i>NBN</i>                            |
| <i>PALB2</i>                          |
| <i>RAD50</i>                          |
| <i>RAD51</i>                          |
| <i>RAD51B</i>                         |
| <i>RAD51C</i>                         |
| <i>RAD51D</i>                         |
| <i>RAD52</i>                          |
| <i>RAD54L</i>                         |
| <i>RP41</i>                           |
