# Supplementary material for: Classification of High-Grade Serous Ovarian Carcinoma by Epithelial-to-Mesenchymal Transition Signature and Homologous Recombination Repair Genes
Source: Genes (Basel). 2021 Jul 20;12(7):1103. doi: 10.3390/genes12071103 (PMC8303300; doi:10.3390/genes12071103)
Supplement: Supplementary file 1 [file genes-12-01103-s001.zip › Table S7.pdf]

**Table S7.** TFEA results from 18 out of 30 HRR genes upregulated in cluster A compared to those in cluster B.

| Transcription Factor | Overlapping Genes | FDR $Q$ value |
|----------------------|-------------------|---------------|
| <i>E2F8</i>          | 8                 | 4.18E-06      |
| <i>E2F2</i>          | 6                 | 8.68E-04      |
| <i>ZNF227</i>        | 4                 | 4.10E-02      |
| <i>ZNF107</i>        | 4                 | 4.10E-02      |
| <i>PRDM9</i>         | 4                 | 4.10E-02      |
| <i>ZNF45</i>         | 4                 | 4.10E-02      |
| <i>E2F3</i>          | 4                 | 4.10E-02      |
| <i>CENPA</i>         | 4                 | 4.10E-02      |
| <i>ZNF689</i>        | 4                 | 4.10E-02      |
| <i>TGIF2</i>         | 4                 | 4.10E-02      |
