# Supplementary material for: Classification of High-Grade Serous Ovarian Carcinoma by Epithelial-to-Mesenchymal Transition Signature and Homologous Recombination Repair Genes
Source: Genes (Basel). 2021 Jul 20;12(7):1103. doi: 10.3390/genes12071103 (PMC8303300; doi:10.3390/genes12071103)
Supplement: Supplementary file 1 [file genes-12-01103-s001.zip › Table S8.pdf]

**Table S8.** TFEA results from genes positively correlated with PC1 (Pearson  $r > 0.9$ ).

| Transcription Factor | Overlapping Genes | FDR $Q$ value |
|----------------------|-------------------|---------------|
| <i>TCF21</i>         | 20                | 1.86E-08      |
| <i>TWIST2</i>        | 17                | 3.11E-06      |
| <i>MEOX2</i>         | 16                | 1.09E-05      |
| <i>OSR2</i>          | 16                | 1.09E-05      |
| <i>OSR1</i>          | 15                | 3.41E-05      |
| <i>PRRX1</i>         | 15                | 3.41E-05      |
| <i>PRRX2</i>         | 15                | 3.41E-05      |
| <i>BCL6B</i>         | 14                | 1.35E-04      |
| <i>ATOH8</i>         | 14                | 1.35E-04      |
| <i>TWIST1</i>        | 14                | 1.35E-04      |
