# Supplementary material for: Classification of High-Grade Serous Ovarian Carcinoma by Epithelial-to-Mesenchymal Transition Signature and Homologous Recombination Repair Genes
Source: Genes (Basel). 2021 Jul 20;12(7):1103. doi: 10.3390/genes12071103 (PMC8303300; doi:10.3390/genes12071103)
Supplement: Supplementary file 1 [file genes-12-01103-s001.zip › Table S9.pdf]

**Table S9.** List of 38 genes used to calculate the EMT index.

| Core EMT-TFs  | Other EMT-related TFs |
|---------------|-----------------------|
| <i>SNAIL</i>  | <i>KLF4</i>           |
| <i>SNAIL2</i> | <i>GSC</i>            |
| <i>ZEB1</i>   | <i>TCF7L2</i>         |
| <i>ZEB2</i>   | <i>ALX1</i>           |
| <i>TWIST1</i> | <i>GATA6</i>          |
|               | <i>RUNX2</i>          |
|               | <i>TCF3</i>           |
|               | <i>SOX4</i>           |
|               | <i>FOXC2</i>          |
|               | <i>NFKB1</i>          |
|               | <i>KLF2</i>           |
|               | <i>KLF6</i>           |
|               | <i>TBX3</i>           |
|               | <i>TCF4</i>           |
|               | <i>PRRX1</i>          |
|               | <i>HOXB7</i>          |
|               | <i>JUN</i>            |
|               | <i>FOS</i>            |
|               | <i>TAZ</i>            |
|               | <i>TGIF1</i>          |
|               | <i>ATF1</i>           |
|               | <i>ERG</i>            |
|               | <i>ETS1</i>           |
|               | <i>ID1</i>            |
|               | <i>TEAD1</i>          |
|               | <i>YAP1</i>           |
|               | <i>NFYA</i>           |
|               | <i>KLF8</i>           |
|               | <i>SOX9</i>           |
|               | <i>SIX1</i>           |
|               | <i>TBXT</i>           |
|               | <i>GATA4</i>          |
|               | <i>TWIST2</i>         |

Abbreviations: EMT, epithelial-to-mesenchymal transition; TF, transcription factor.
