# Supplementary material for: Classification of High-Grade Serous Ovarian Carcinoma by Epithelial-to-Mesenchymal Transition Signature and Homologous Recombination Repair Genes
Source: Genes (Basel). 2021 Jul 20;12(7):1103. doi: 10.3390/genes12071103 (PMC8303300; doi:10.3390/genes12071103)
Supplement: Supplementary file 1 [file genes-12-01103-s001.zip › Table S10.pdf]

**Table S10.** Tumor purity and ploidy estimate for each sample.

| Sample                | Tumor Purity | Ploidy |
|-----------------------|--------------|--------|
| <i>gBRCA1</i> /mut_1  | 0.44         | 3.697  |
| <i>gBRCA1</i> /mut_2  | 0.77         | 2.679  |
| <i>gBRCA1</i> /mut_3  | 0.50         | 3.728  |
| <i>gBRCA1</i> /mut_4  | 0.73         | 3.307  |
| <i>gBRCA1</i> /mut_5  | 0.77         | 5.886  |
| <i>gBRCA2</i> /mut_1  | 0.58         | 2.350  |
| <i>gBRCA2</i> /mut_2  | 0.48         | 3.511  |
| <i>gBRCA2</i> /mut_3  | 0.10         | 2.010  |
| <i>gBRCA2</i> /mut_4  | 0.51         | 3.122  |
| <i>gBRCA2</i> /mut_5  | 0.75         | 1.913  |
| <i>gBRCA1</i> /2wt_1  | 0.43         | 1.949  |
| <i>gBRCA1</i> /2wt_2  | 0.88         | 3.350  |
| <i>gBRCA1</i> /2wt_3  | 0.95         | 1.864  |
| <i>gBRCA1</i> /2wt_4  | 0.10         | 2.110  |
| <i>gBRCA1</i> /2wt_5  | 0.80         | 3.518  |
| <i>gBRCA1</i> /2wt_6  | 0.31         | 2.001  |
| <i>gBRCA1</i> /2wt_7  | 0.10         | 2.060  |
| <i>gBRCA1</i> /2wt_8  | 0.43         | 3.420  |
| <i>gBRCA1</i> /2wt_9  | 0.72         | 3.903  |
| <i>gBRCA1</i> /2wt_10 | 0.86         | 1.794  |
